# Supplementary material for: Chronic exposure to Salton Sea aerosols elicits pulmonary inflammation and shifts in murine lung and fecal microbiome diversity
Source: Research Square preprint supplement (doi:10.21203/rs.3.rs-9569949/v1), 2026-05-06
Supplement: Supplementary file 1 [file 3c998e65d0d6f12cdfb11f5a.docx]

**List of Supplementary Figures**

**Table S1. Top 100 Genera prevalence (1% RA) in lung microbiomes** by exposure material and sorted by highest to lowest mean prevalence

**Fig S2. PCoA of fecal microbiome composition** by treatment group using CLR-transformed (Aitchison) distances

**Table S2. Surface type frequencies**

**Table S1. Top 100 Genera prevalence (1% RA) in lung microbiomes** by exposure material and sorted by highest to lowest mean prevalence

| **Genus** | **Control Air** | **PD01** | **PD02** | **AG01** | **AG03** | **WI01** | **WI03** | **WI04** | **Mean prevalence** |
| --- | --- | --- | --- | --- | --- | --- | --- | --- | --- |
| *Pseudomonas* | 0.364 | 0.500 | 0.571 | 0.500 | 0.667 | 0.800 | 0.125 | 0.667 | 0.484 |
| *Staphylococcus* | 0.500 | 0.667 | 0.429 | 0.333 | 0.667 | 0.400 | 0.875 | 0.833 | 0.482 |
| *Roseococcus* | 0.000 | 0.000 | 0.571 | 0.833 | 0.833 | 0.000 | 0.000 | 0.000 | 0.351 |
| *Rhodopseudomonas* | 0.114 | 0.333 | 0.429 | 0.500 | 0.167 | 0.000 | 0.125 | 0.000 | 0.344 |
| *Bradyrhizobium* | 0.114 | 0.167 | 0.714 | 0.167 | 0.667 | 0.400 | 0.250 | 0.000 | 0.290 |
| *Afipia* | 0.114 | 0.167 | 0.429 | 0.333 | 0.000 | 0.400 | 0.125 | 0.167 | 0.261 |
| *Lactobacillus* | 0.364 | 0.333 | 0.000 | 0.333 | 0.167 | 0.000 | 0.125 | 0.000 | 0.258 |
| *Escherichia Shigella* | 0.068 | 0.333 | 0.000 | 0.500 | 0.000 | 0.000 | 0.000 | 0.000 | 0.225 |
| *Clostridium* | 0.386 | 0.167 | 0.000 | 0.333 | 0.333 | 0.800 | 0.125 | 0.167 | 0.222 |
| *Acidovorax* | 0.136 | 0.500 | 0.000 | 0.167 | 0.500 | 0.200 | 0.000 | 0.500 | 0.201 |
| *Helicobacter* | 0.114 | 0.167 | 0.000 | 0.500 | 0.000 | 0.200 | 0.000 | 0.000 | 0.195 |
| *Corynebacterium* | 0.159 | 0.000 | 0.286 | 0.333 | 0.167 | 0.600 | 0.250 | 0.000 | 0.195 |
| *Microbacterium* | 0.023 | 0.000 | 0.571 | 0.167 | 0.167 | 0.600 | 0.000 | 0.500 | 0.190 |
| *Burkholderia Caballeronia Paraburkholderia* | 0.091 | 0.167 | 0.286 | 0.167 | 0.000 | 0.400 | 0.125 | 0.000 | 0.177 |
| *Streptococcus* | 0.227 | 0.167 | 0.286 | 0.000 | 0.167 | 0.200 | 0.125 | 0.000 | 0.170 |
| *Sphingomonas* | 0.068 | 0.167 | 0.429 | 0.000 | 0.333 | 0.200 | 0.000 | 0.167 | 0.166 |
| *Turicibacter* | 0.159 | 0.333 | 0.000 | 0.167 | 0.500 | 0.200 | 0.000 | 0.000 | 0.165 |
| *Aquabacterium* | 0.182 | 0.000 | 0.143 | 0.333 | 0.167 | 0.000 | 0.125 | 0.333 | 0.165 |
| *8 YEA 48* | 0.000 | 0.000 | 0.571 | 0.000 | 0.333 | 0.000 | 0.000 | 0.000 | 0.143 |
| *Delftia* | 0.205 | 0.167 | 0.000 | 0.167 | 0.000 | 0.200 | 0.125 | 0.167 | 0.134 |
| *Rhodococcus* | 0.023 | 0.167 | 0.000 | 0.333 | 0.000 | 0.200 | 0.000 | 0.000 | 0.131 |
| *Bifidobacterium* | 0.159 | 0.333 | 0.000 | 0.000 | 0.167 | 0.400 | 0.000 | 0.000 | 0.123 |
| *Agrobacterium* | 0.114 | 0.333 | 0.000 | 0.000 | 0.000 | 0.000 | 0.125 | 0.167 | 0.112 |
| *Acinetobacter* | 0.159 | 0.000 | 0.286 | 0.000 | 0.333 | 0.000 | 0.000 | 1.000 | 0.111 |
| *Adlercreutzia* | 0.091 | 0.167 | 0.000 | 0.167 | 0.333 | 0.000 | 0.000 | 0.000 | 0.106 |
| *Enterococcus* | 0.114 | 0.167 | 0.143 | 0.000 | 0.167 | 0.200 | 0.000 | 0.000 | 0.106 |
| *Brevundimonas* | 0.068 | 0.333 | 0.000 | 0.000 | 0.000 | 0.000 | 0.000 | 0.167 | 0.100 |
| *Roseateles* | 0.091 | 0.000 | 0.143 | 0.167 | 0.000 | 0.000 | 0.000 | 0.167 | 0.100 |
| *Dubosiella* | 0.045 | 0.333 | 0.000 | 0.000 | 0.333 | 0.000 | 0.000 | 0.000 | 0.095 |
| *Atopostipes* | 0.091 | 0.000 | 0.286 | 0.000 | 0.167 | 0.600 | 0.000 | 0.000 | 0.094 |
| *Anaerococcus* | 0.045 | 0.000 | 0.143 | 0.167 | 0.000 | 0.000 | 0.000 | 0.000 | 0.089 |
| *Massilia* | 0.045 | 0.167 | 0.143 | 0.000 | 0.000 | 0.000 | 0.000 | 0.333 | 0.089 |
| *Mycobacterium* | 0.068 | 0.000 | 0.286 | 0.000 | 0.000 | 0.000 | 0.000 | 0.000 | 0.088 |
| *Rothia* | 0.068 | 0.000 | 0.286 | 0.000 | 0.000 | 0.200 | 0.000 | 0.000 | 0.088 |
| *Aminobacter* | 0.000 | 0.000 | 0.000 | 0.333 | 0.333 | 0.000 | 0.250 | 0.000 | 0.083 |
| *Paenarthrobacter* | 0.000 | 0.000 | 0.000 | 0.333 | 0.833 | 0.800 | 1.000 | 1.000 | 0.083 |
| *Gemmatimonas* | 0.023 | 0.167 | 0.143 | 0.000 | 0.000 | 0.000 | 0.000 | 0.000 | 0.083 |
| *Enhydrobacter* | 0.045 | 0.000 | 0.286 | 0.000 | 0.000 | 0.400 | 0.125 | 0.167 | 0.083 |
| *Caulobacter* | 0.000 | 0.000 | 0.143 | 0.167 | 0.000 | 0.000 | 0.000 | 0.167 | 0.077 |
| *Neisseria* | 0.000 | 0.167 | 0.143 | 0.000 | 0.000 | 0.000 | 0.000 | 0.000 | 0.077 |
| *Marmoricola* | 0.023 | 0.000 | 0.286 | 0.000 | 0.000 | 0.000 | 0.000 | 0.000 | 0.077 |
| *Saccharopolyspora* | 0.000 | 0.000 | 0.286 | 0.000 | 0.000 | 0.000 | 0.000 | 0.000 | 0.071 |
| *Serratia* | 0.000 | 0.000 | 0.286 | 0.000 | 0.000 | 0.000 | 0.000 | 0.000 | 0.071 |
| *Limnohabitans* | 0.091 | 0.000 | 0.000 | 0.167 | 0.000 | 0.000 | 0.000 | 0.000 | 0.064 |
| *Micrococcus* | 0.114 | 0.000 | 0.143 | 0.000 | 0.000 | 0.200 | 0.000 | 0.000 | 0.064 |
| *Chryseobacterium* | 0.091 | 0.000 | 0.143 | 0.000 | 0.167 | 0.000 | 0.000 | 0.000 | 0.058 |
| *Alistipes* | 0.045 | 0.167 | 0.000 | 0.000 | 0.000 | 0.000 | 0.000 | 0.000 | 0.053 |
| *Thermobacillus* | 0.045 | 0.000 | 0.000 | 0.167 | 0.000 | 0.000 | 0.000 | 0.000 | 0.053 |
| *Bacillus* | 0.068 | 0.000 | 0.143 | 0.000 | 0.167 | 0.200 | 0.000 | 0.000 | 0.053 |
| *Rubrobacter* | 0.068 | 0.000 | 0.143 | 0.000 | 0.000 | 0.000 | 0.000 | 0.000 | 0.053 |
| *Brucella* | 0.023 | 0.000 | 0.000 | 0.167 | 0.000 | 0.000 | 0.000 | 0.000 | 0.047 |
| *Diaphorobacter* | 0.023 | 0.000 | 0.000 | 0.167 | 0.167 | 0.200 | 0.000 | 0.000 | 0.047 |
| *Lachnoclostridium* | 0.023 | 0.000 | 0.000 | 0.167 | 0.000 | 0.000 | 0.000 | 0.000 | 0.047 |
| *Pediococcus* | 0.023 | 0.167 | 0.000 | 0.000 | 0.000 | 0.000 | 0.000 | 0.000 | 0.047 |
| *Pyrinomonas* | 0.023 | 0.167 | 0.000 | 0.000 | 0.000 | 0.200 | 0.000 | 0.000 | 0.047 |
| *Solirubrobacter* | 0.023 | 0.167 | 0.000 | 0.000 | 0.000 | 0.000 | 0.000 | 0.000 | 0.047 |
| *UCG 002* | 0.023 | 0.000 | 0.000 | 0.167 | 0.000 | 0.000 | 0.125 | 0.000 | 0.047 |
| *Candidatus Udaeobacter* | 0.045 | 0.000 | 0.143 | 0.000 | 0.000 | 0.000 | 0.000 | 0.000 | 0.047 |
| *Dechloromonas* | 0.045 | 0.000 | 0.143 | 0.000 | 0.333 | 0.000 | 0.000 | 0.167 | 0.047 |
| *Gordonia* | 0.045 | 0.000 | 0.143 | 0.000 | 0.000 | 0.000 | 0.000 | 0.000 | 0.047 |
| *nthomonas* | 0.045 | 0.000 | 0.143 | 0.000 | 0.167 | 0.000 | 0.000 | 0.000 | 0.047 |
| *Acetatifactor* | 0.000 | 0.167 | 0.000 | 0.000 | 0.000 | 0.000 | 0.000 | 0.000 | 0.042 |
| *Amycolatopsis* | 0.000 | 0.167 | 0.000 | 0.000 | 0.000 | 0.000 | 0.000 | 0.000 | 0.042 |
| *Bergeyella* | 0.000 | 0.000 | 0.000 | 0.167 | 0.000 | 0.000 | 0.000 | 0.000 | 0.042 |
| *Candidatus Methylopumilus* | 0.000 | 0.167 | 0.000 | 0.000 | 0.000 | 0.000 | 0.125 | 0.000 | 0.042 |
| *Devosia* | 0.000 | 0.000 | 0.000 | 0.167 | 0.167 | 0.000 | 0.000 | 0.000 | 0.042 |
| *Eubacterium xylanophilum group* | 0.000 | 0.000 | 0.000 | 0.167 | 0.167 | 0.000 | 0.000 | 0.000 | 0.042 |
| *Haloquadratum* | 0.000 | 0.000 | 0.000 | 0.167 | 0.000 | 0.000 | 0.000 | 0.000 | 0.042 |
| *Lachnospiraceae AC2044 group* | 0.000 | 0.000 | 0.000 | 0.167 | 0.000 | 0.000 | 0.000 | 0.000 | 0.042 |
| *Lachnospiraceae NK4A136 group* | 0.000 | 0.167 | 0.000 | 0.000 | 0.000 | 0.000 | 0.125 | 0.000 | 0.042 |
| *Listeria* | 0.000 | 0.000 | 0.000 | 0.167 | 0.000 | 0.000 | 0.000 | 0.000 | 0.042 |
| *Neochlamydia* | 0.000 | 0.167 | 0.000 | 0.000 | 0.000 | 0.000 | 0.000 | 0.000 | 0.042 |
| *Pedomicrobium* | 0.000 | 0.167 | 0.000 | 0.000 | 0.000 | 0.000 | 0.000 | 0.000 | 0.042 |
| *Peribacillus* | 0.000 | 0.000 | 0.000 | 0.167 | 0.000 | 0.000 | 0.000 | 0.000 | 0.042 |
| *Planococcus* | 0.000 | 0.167 | 0.000 | 0.000 | 0.000 | 0.200 | 0.000 | 0.000 | 0.042 |
| *Pseudolabrys* | 0.000 | 0.000 | 0.000 | 0.167 | 0.167 | 0.000 | 0.000 | 0.000 | 0.042 |
| *Puia* | 0.000 | 0.000 | 0.000 | 0.167 | 0.000 | 0.000 | 0.000 | 0.000 | 0.042 |
| *Rhodoferax* | 0.000 | 0.167 | 0.000 | 0.000 | 0.000 | 0.000 | 0.000 | 0.000 | 0.042 |
| *Roseburia* | 0.000 | 0.167 | 0.000 | 0.000 | 0.000 | 0.000 | 0.000 | 0.000 | 0.042 |
| *Roseiarcus* | 0.000 | 0.167 | 0.000 | 0.000 | 0.000 | 0.000 | 0.000 | 0.000 | 0.042 |
| *Shuttleworthia* | 0.000 | 0.167 | 0.000 | 0.000 | 0.000 | 0.000 | 0.000 | 0.000 | 0.042 |
| *Sphingobacterium* | 0.000 | 0.167 | 0.000 | 0.000 | 0.000 | 0.000 | 0.000 | 0.167 | 0.042 |
| *Sphingobium* | 0.000 | 0.167 | 0.000 | 0.000 | 0.000 | 0.000 | 0.000 | 0.000 | 0.042 |
| *UCG 005* | 0.000 | 0.167 | 0.000 | 0.000 | 0.000 | 0.000 | 0.000 | 0.000 | 0.042 |
| *Baekduia* | 0.023 | 0.000 | 0.143 | 0.000 | 0.000 | 0.000 | 0.000 | 0.000 | 0.041 |
| *Blastococcus* | 0.023 | 0.000 | 0.143 | 0.000 | 0.333 | 0.000 | 0.000 | 0.000 | 0.041 |
| *Cloacibacterium* | 0.023 | 0.000 | 0.143 | 0.000 | 0.000 | 0.000 | 0.000 | 0.000 | 0.041 |
| *Hymenobacter* | 0.023 | 0.000 | 0.143 | 0.000 | 0.000 | 0.000 | 0.000 | 0.000 | 0.041 |
| *Jatrophihabitans* | 0.023 | 0.000 | 0.143 | 0.000 | 0.000 | 0.000 | 0.000 | 0.000 | 0.041 |
| *Lichenibacterium* | 0.023 | 0.000 | 0.143 | 0.000 | 0.000 | 0.000 | 0.000 | 0.000 | 0.041 |
| *Niallia* | 0.023 | 0.000 | 0.143 | 0.000 | 0.000 | 0.000 | 0.000 | 0.000 | 0.041 |
| *Paenibacillus* | 0.023 | 0.000 | 0.143 | 0.000 | 0.000 | 0.000 | 0.000 | 0.333 | 0.041 |
| *Pseudonocardia* | 0.023 | 0.000 | 0.143 | 0.000 | 0.000 | 0.000 | 0.000 | 0.000 | 0.041 |
| *Reyranella* | 0.023 | 0.000 | 0.143 | 0.000 | 0.000 | 0.000 | 0.000 | 0.000 | 0.041 |
| *Treponema* | 0.023 | 0.000 | 0.143 | 0.000 | 0.000 | 0.000 | 0.000 | 0.000 | 0.041 |
| *Cutibacterium* | 0.159 | 0.000 | 0.000 | 0.000 | 0.000 | 0.400 | 0.000 | 0.000 | 0.040 |
| *Aggregatibacter* | 0.000 | 0.000 | 0.143 | 0.000 | 0.000 | 0.000 | 0.000 | 0.000 | 0.036 |
| *Alteribacter* | 0.000 | 0.000 | 0.143 | 0.000 | 0.000 | 0.000 | 0.000 | 0.000 | 0.036 |
| *Caldovatus* | 0.000 | 0.000 | 0.143 | 0.000 | 0.000 | 0.000 | 0.000 | 0.000 | 0.036 |
| *Candidatus Alysiosphaera* | 0.000 | 0.000 | 0.143 | 0.000 | 0.000 | 0.000 | 0.125 | 0.000 | 0.036 |

**
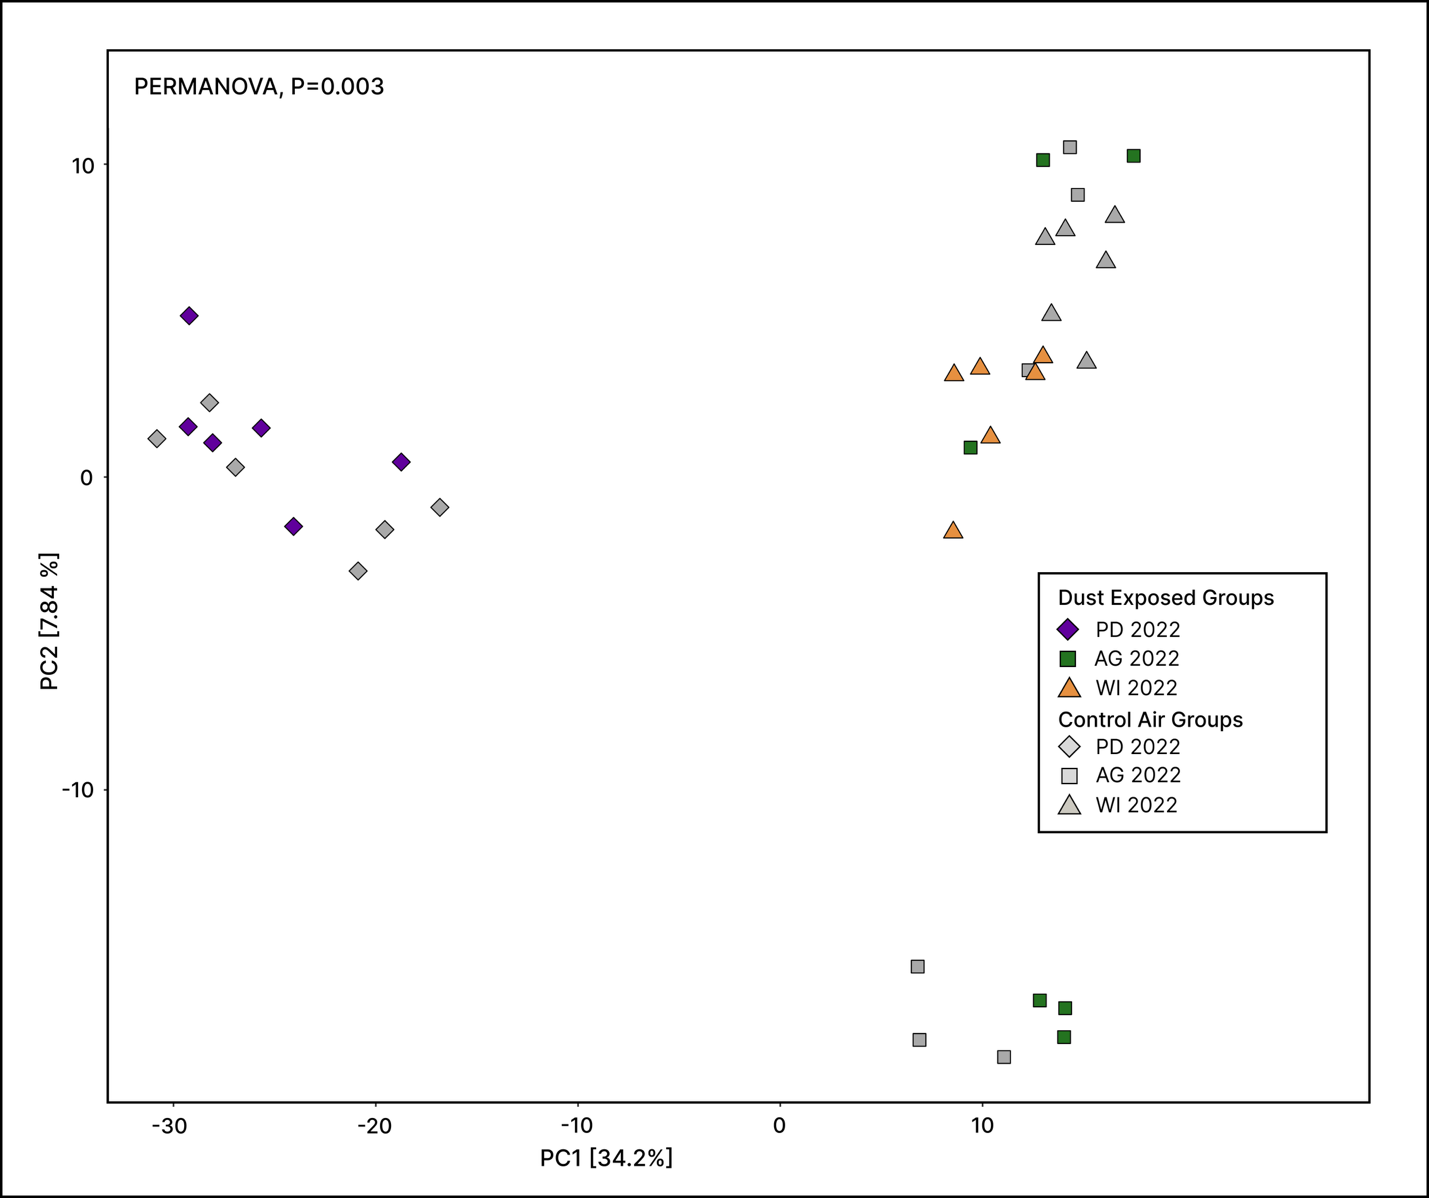
**

**Fig S2. PCoA of fecal microbiome composition** by treatment group using CLR-transformed (Aitchison) distances

|  | Developed, Open Space | Developed, Low Intensity | Developed, Medium Intensity | Developed High Intensity | Barren Land | Deciduous Forest | Evergreen Forest | Mixed Forest | Shrub/  Scrub | Grassland/  Herbaceous | Pasture/Hay | Cultivated Crops | Woody Wetlands | Emergent Herbaceous Wetlands | Mexico | Open Water | Salton Sea |
| --- | --- | --- | --- | --- | --- | --- | --- | --- | --- | --- | --- | --- | --- | --- | --- | --- | --- |
| AG2021 | 1.28% | 0.99% | 1.14% | 0.51% | 38.84% | NA | 0.29% | 0.07% | 40.89% | 4.20% | 0.16% | 1.94% | 0.11% | 0.23% | 0.90% | 4.48% | 3.97% |
| AG2022 | 1.06% | 0.84% | 0.91% | 0.17% | 60.65% | NA | 0.15% | 0.06% | 15.00% | 1.90% | 0.18% | 3.15% | 0.13% | 0.12% | 12.81% | 2.26% | 0.60% |
| PD2021 | 1.99% | 1.64% | 2.26% | 11.45% | 14.30% | 0.00% | 0.66% | 0.07% | 57.19% | 4.79% | 0.16% | 0.91% | 0.09% | 0.13% | 0.25% | 4.04% | 0.08% |
| PD2022 | 2.87% | 2.37% | 3.42% | 22.66% | 13.05% | 0.00% | 0.99% | 0.20% | 37.69% | 5.05% | 0.34% | 2.03% | 0.17% | 0.31% | 3.41% | 4.34% | 1.10% |
| WI2020 | 1.05% | 0.83% | 0.59% | 0.14% | 29.11% | NA | 0.13% | 0.04% | 51.00% | 4.24% | 0.17% | 3.21% | 0.14% | 0.22% | 2.26% | 0.18% | 6.70% |
| WI2021 | 1.37% | 1.02% | 0.95% | 0.28% | 22.38% | 0.00% | 0.28% | 0.03% | 58.89% | 4.58% | 0.20% | 2.22% | 0.22% | 0.14% | 1.05% | 2.58% | 3.82% |
| WI2022 | 1.05% | 1.05% | 0.76% | 0.18% | 37.00% | NA | 0.09% | 0.04% | 28.00% | 1.83% | 0.42% | 7.68% | 0.17% | 0.24% | 11.02% | 1.49% | 8.98% |

**Table S2. Surface Type Frequencies**
